# Supplementary material
Source: HighWire-hosted journal article supplement (https://bmjopenquality.bmj.com/highwire/filestream/145477/field_highwire_adjunct_files/0/bmjoq-2022-002152supp001_data_supplement.pdf)
Supplement: bmjoq-2022-002152supp001_data_supplement.pdf [file bmjoq-2022-002152supp001_data_supplement.pdf]

**Table 1. Competency framework**

| Competency                              | Details                                                                                                                                                                                                                                                                                                                                                                                                                                                                                                        |
|-----------------------------------------|----------------------------------------------------------------------------------------------------------------------------------------------------------------------------------------------------------------------------------------------------------------------------------------------------------------------------------------------------------------------------------------------------------------------------------------------------------------------------------------------------------------|
| <b>1. Qualifications and experience</b> |                                                                                                                                                                                                                                                                                                                                                                                                                                                                                                                |
| Qualifications                          | <ul style="list-style-type: none"> <li>Pharmacist independent prescriber registered with the General Pharmaceutical Council</li> <li>Secondary care clinical diploma</li> </ul>                                                                                                                                                                                                                                                                                                                                |
| Experience                              | <ul style="list-style-type: none"> <li>Experience of working on cardiology wards as a pharmacist</li> <li>Integrated into the cardiology multidisciplinary team</li> <li>Understanding of the roles of all multidisciplinary team members (e.g. community cardiac rehab, cardiology psychologist); know how and when to refer to them</li> </ul>                                                                                                                                                               |
| <b>2. Knowledge</b>                     |                                                                                                                                                                                                                                                                                                                                                                                                                                                                                                                |
| Cardiology                              | <ul style="list-style-type: none"> <li>Basic cardiac anatomy</li> <li>Presentation and diagnosis of MI – NSTEMI and STEMI, troponin changes, and ECG</li> <li>Angiogram and PCI procedures and reports</li> <li>Basic principles of cardiac stents</li> <li>ECHO test and interpretation of report findings</li> <li>Relevant conditions: <ul style="list-style-type: none"> <li>Angina</li> <li>Heart failure</li> <li>Hypertension</li> <li>Atrial fibrillation and stroke prevention</li> </ul> </li> </ul> |

---

|                                |                                                                                                                                                                                                                                                                                                                                                                                                                           |
|--------------------------------|---------------------------------------------------------------------------------------------------------------------------------------------------------------------------------------------------------------------------------------------------------------------------------------------------------------------------------------------------------------------------------------------------------------------------|
|                                | <ul style="list-style-type: none"><li>○ Lipid management and familial hypercholesterolaemia</li><li>○ Diabetes</li><li>● Normal progress / recovery timeline after MI</li><li>● Lifestyle advice (smoking cessation, exercise, flying, driving, cardiac rehab exercise programmes, diet, return to work)</li><li>● Risk scoring tools (CHA<sub>2</sub>DS<sub>2</sub>-VASc, GRACE, TIMI, HAS-BLED, PRECISE-DAPT)</li></ul> |
| Laboratory results and actions | <p>The following blood tests, normal limits, and reasons for deranged results:</p> <ul style="list-style-type: none"><li>● Urea and electrolytes</li><li>● Full blood count</li><li>● Liver function tests</li><li>● HbA1c (limits for no diabetes, pre-diabetes, and new diabetes)</li><li>● Full lipid profile</li></ul>                                                                                                |
| Medication classes             | <ul style="list-style-type: none"><li>● Antianginals</li><li>● Antiarrhythmics (for rate and rhythm control)</li><li>● Anticoagulants</li><li>● Antiplatelets</li><li>● Dual antiplatelet strategies (including assessment for extended duration antiplatelet therapy)</li><li>● Triple therapy guidance</li></ul>                                                                                                        |

---

- 
- Antihypertensives
  - Lipid-modifying drugs
  - Diuretics
  - Post-MI secondary prevention
  - Oral hypoglycaemic agents and insulin
  - Gastrointestinal protection

For each of these classes:

- Mechanisms of action
- Rationale for use
- Monitoring
- Contraindications and cautions
- Side effects
- Interactions
- Dose adjustments
- Likely durations for treatment
- Equivalent doses between drugs (in class and between classes)
- Link to interpretation of history, results, symptoms

---

Cardiology guidelines

These include (but are not limited to) relevant guidelines from:

- National Institute for Health and Care Excellence (NICE)
  - Scottish Intercollegiate Guidelines Network (SIGN)
  - Joint British Societies (JBS)
-

- 
- European Society of Cardiology (ESC)

---

### 3. Skills

---

- |                                       |                                                                                                                                                                                                                                                                                                                                                                                                          |
|---------------------------------------|----------------------------------------------------------------------------------------------------------------------------------------------------------------------------------------------------------------------------------------------------------------------------------------------------------------------------------------------------------------------------------------------------------|
| Cardiac symptoms since MI / discharge | <ul style="list-style-type: none"><li>• Take clinical history of any angina, chest pain, shortness of breath, dizziness, palpitations, pedal oedema</li><li>• Assess symptoms, make a management plan, undertake or recommend monitoring, know red flags and referral criteria</li><li>• Understand possible anxiety post-MI</li></ul>                                                                   |
| Practical clinical skills             | <ul style="list-style-type: none"><li>• Take heart rate and blood pressure; understand normal limits and trends</li><li>• Assess weight</li><li>• Assess physical symptoms and side effects (e.g. rash, chest pain, musculoskeletal pain, indigestion)</li><li>• Request blood tests if required, and provide appropriate follow-up or monitoring plan</li><li>• ECG interpretation (advanced)</li></ul> |
| Cardiology medicines optimisation     | <ul style="list-style-type: none"><li>• Apply evidence-based medicine to offer patient-centred, high-quality, safe and cost-effective prescribing</li><li>• Explore medicines-taking behaviours</li><li>• Identify nonadherence behaviours</li><li>• Recognise polypharmacy and de-prescribe unnecessary medication(s)</li></ul>                                                                         |
-

---

|                                                           |                                                                                                                                                                                                                                                                                                                                                                                                                                                                                                                                                                           |
|-----------------------------------------------------------|---------------------------------------------------------------------------------------------------------------------------------------------------------------------------------------------------------------------------------------------------------------------------------------------------------------------------------------------------------------------------------------------------------------------------------------------------------------------------------------------------------------------------------------------------------------------------|
|                                                           | <ul style="list-style-type: none"><li>• Understand principles of medicines reconciliation to allow accurate medication history and communication of changes with GP and patient</li></ul>                                                                                                                                                                                                                                                                                                                                                                                 |
| Consultation communication skills                         | <ul style="list-style-type: none"><li>• Provide patient-centred care and support patients to achieve better outcomes from their medicines</li><li>• Lead discussion and shared decision-making around medications to empower patients</li><li>• Identify medication adherence issues</li><li>• Discuss risks and benefits of medication to support decision-making</li><li>• Manage difficult conversations; overcome communication barriers</li><li>• Provide clear information, and plan for monitoring and follow-up</li><li>• Check patients' understanding</li></ul> |
| <hr/> <b>4. Practicalities of clinic management</b> <hr/> |                                                                                                                                                                                                                                                                                                                                                                                                                                                                                                                                                                           |
| Local IT systems                                          | <p>Know how to use IT systems to access patients results, clinical records and appointments; relevant systems may vary locally, but those used at our centre include:</p> <ul style="list-style-type: none"><li>• EPRO, for letter writing, PCI letter</li><li>• Cardiobase, for ECHO test results</li><li>• PPM+, for test results, patient history, discharge letters, GP tab for current medications, ECHO and PCI reports</li></ul>                                                                                                                                   |

---

---

|                   |                                                                                                                                                                                                                                                                                      |
|-------------------|--------------------------------------------------------------------------------------------------------------------------------------------------------------------------------------------------------------------------------------------------------------------------------------|
|                   | <ul style="list-style-type: none"><li>• ICE, to request blood tests and see some out-of-area blood tests</li></ul>                                                                                                                                                                   |
| Record keeping    | <ul style="list-style-type: none"><li>• Dictation of clinic letters to GP and patient</li><li>• Document history, clinical findings, monitoring and plan in medical notes and letter</li><li>• Arrange referral and follow-up</li></ul>                                              |
| Clinic management | <ul style="list-style-type: none"><li>• Triage patients to the post-MI medicines optimisation clinic</li><li>• Management of medical notes</li><li>• Timekeeping for consultations</li><li>• Outpatient booking procedures, criteria for arranging follow-up and referrals</li></ul> |

---

ECG, electrocardiogram; ECHO, echocardiogram; GRACE, Global Registry of Acute Coronary Events; HAS-BLED, hypertension, abnormal renal and liver function, stroke, bleeding, labile international normalised ratio, elderly, drugs or alcohol; HbA1c, glycated haemoglobin; MI, myocardial infarction; PRECISE-DAPT, **predicting bleeding complications in patients undergoing stent implantation** and subsequent dual antiplatelet therapy; NSTEMI; non-ST-elevation MI; PCI, percutaneous coronary intervention; STEMI, ST-elevation MI; TIMI, thrombolysis in MI.
